# Supplementary material for: An improved mosquito electrocuting trap that safely reproduces epidemiologically relevant metrics of mosquito human-feeding behaviours as determined by human landing catch
Source: Springer Nature journal article supplement (doi:10.1186/s12936-016-1513-1), 2016-09-13

*Anopheles gambiae s.l.*

**A**

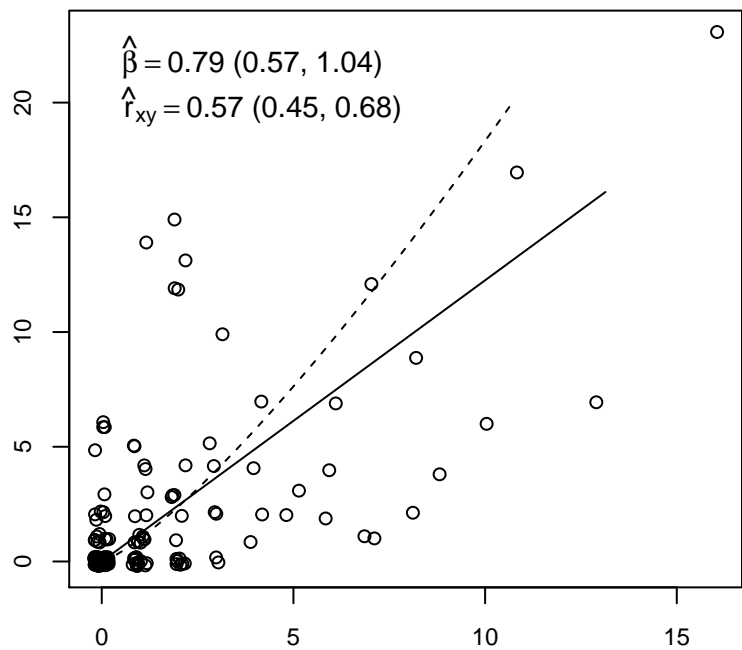

**B**

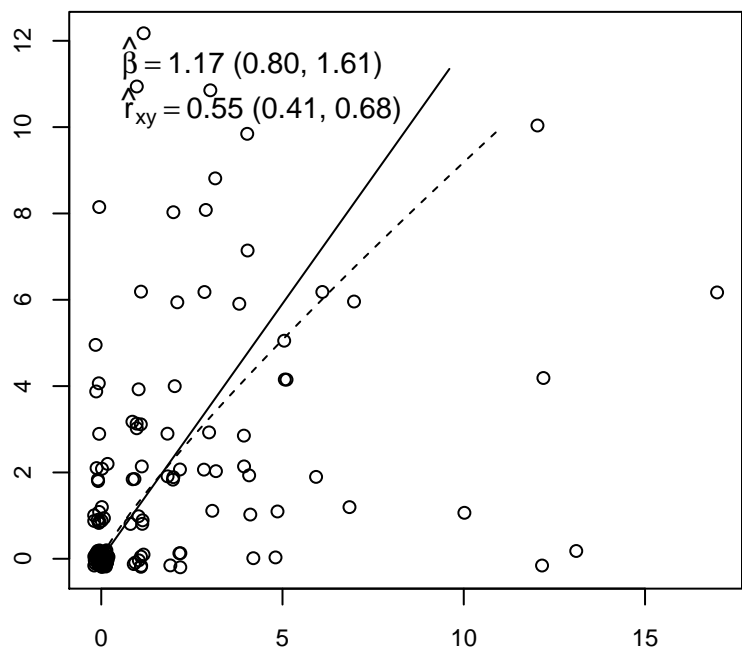

Catches in Human Landing Catch

*Culex spp.*

**C**

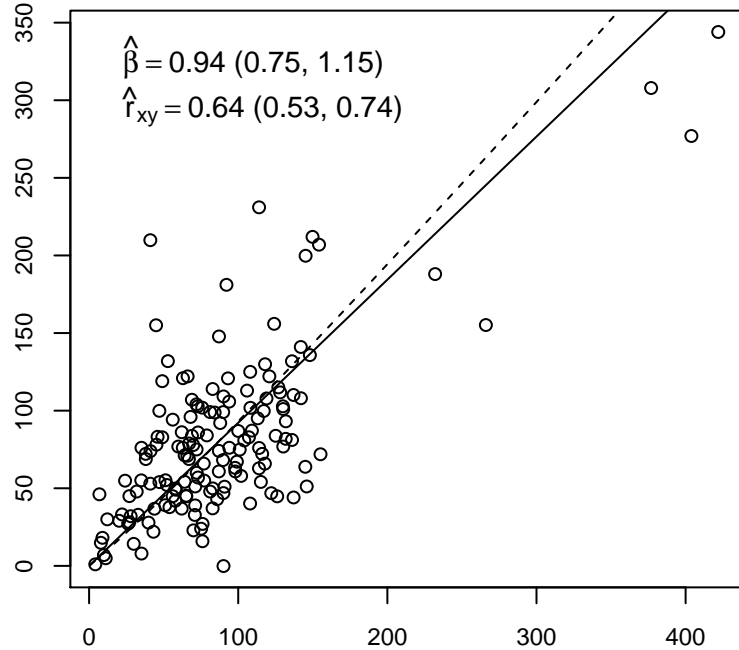

**D**

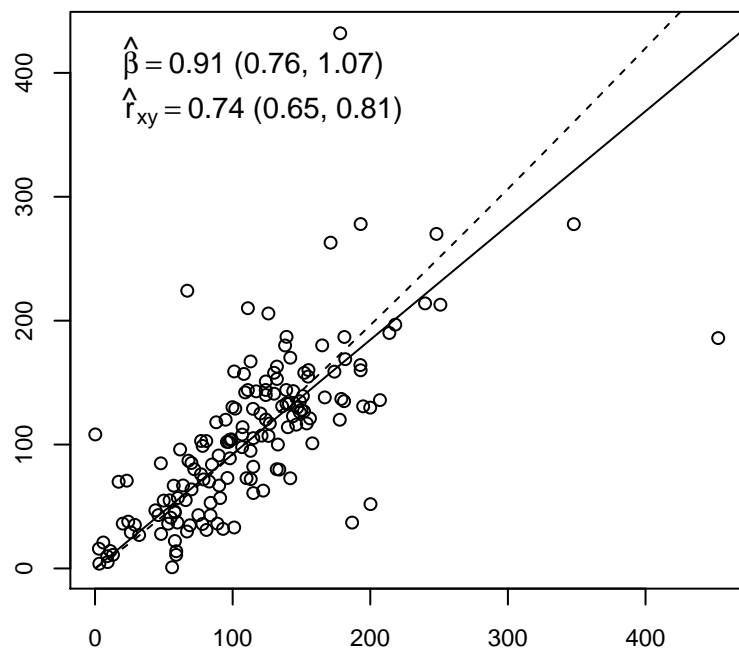

Supplement: MOESM1 [file 10696688]
